# Supplementary material
Source: PubMed Central journal article supplement (PMC7755949)
Supplement: DS_10.1177_0022034520949486.pdf [file DS_10.1177_0022034520949486.pdf]

## **The ubiquitin system and A20: implications in health and disease**

Erin C. Mooney<sup>1,2</sup> and Sinem Esra Sahingur<sup>1\*</sup>

<sup>1</sup>Department of Periodontics, School of Dental Medicine, University of Pennsylvania, Philadelphia, PA, USA.

<sup>2</sup>Philips Institute for Oral Health Research, Virginia Commonwealth University, School of Dentistry, Richmond, VA, USA

### **\*Correspondence:**

Sinem Esra Sahingur

[sahingur@upenn.edu](mailto:sahingur@upenn.edu)

**Appendix Table 1. Structure and function of ubiquitin-editing enzymes in the regulation of NF- $\kappa$ B signaling.**

| Ubiquitin-editing enzymes                      | Structure                                                                                                                                                | Targeted Substrates                                                                                   | Function                                                                | Related human diseases                                                                                 | Refs.                                                                                  |
|------------------------------------------------|----------------------------------------------------------------------------------------------------------------------------------------------------------|-------------------------------------------------------------------------------------------------------|-------------------------------------------------------------------------|--------------------------------------------------------------------------------------------------------|----------------------------------------------------------------------------------------|
| cIAP1                                          | Possesses baculoviral IAP repeat domains which facilitate protein-protein interactions and a RING-IBR-RING domain which promotes its E3 ligase function. | NEMO, TRAF2, RIP1, itself                                                                             | Regulator of NF- $\kappa$ B pathway.                                    | Inflammatory bowel disease, autoinflammation and lymphoid malignancies.                                | (Hrdinka and Yabal 2019; Mace et al. 2010)                                             |
| PARKIN (Park2)                                 | Contains an ubiquitin-like domain at the N-terminus and 4 zinc-coordinating RING domains which mediate E3 ligase activity.                               | NEMO, TRAF2, RIP1                                                                                     | Promotes the activation of NF- $\kappa$ B signaling.                    | Early-onset Parkinson's disease, glioblastoma multiforme, cancers.                                     | (Seirafi et al. 2015; Swatek and Komander 2016; Veeriah et al. 2010; Wang et al. 2018) |
| HOIL-1 (heme-oxidized IRP2 ubiquitin ligase-1) | Contains a N-terminal ubiquitin-binding domain, Npl4-ypte zinc finger domain for M1 polyubiquitin binding and a C-terminal RING-IBR-RING (RBR) domain.   | In a complex with SHARPIN and HOIP (HOIL-1 interacting protein) mediates M1-linked polyubiquitination | Facilitates the activation of NF- $\kappa$ B dependent gene expression. | Autoinflammatory syndrome, cardiomyopathy, amylopectinosis and increased risk of bacterial infections. | (Boisson et al. 2012; Elton et al. 2015)                                               |

|                                                          |                                                                                                                                                                            |                                                                                                                      |                                                                            |                                                                                                     |                                                                                |
|----------------------------------------------------------|----------------------------------------------------------------------------------------------------------------------------------------------------------------------------|----------------------------------------------------------------------------------------------------------------------|----------------------------------------------------------------------------|-----------------------------------------------------------------------------------------------------|--------------------------------------------------------------------------------|
|                                                          |                                                                                                                                                                            | of NEMO and RIP1                                                                                                     |                                                                            |                                                                                                     |                                                                                |
| HOIP (HOIL-1-interacting protein)                        | Contains a N-terminal ubiquitin associated domain and a C-terminal RBR domain with a unique linear ubiquitin chain determining region (LDD) .                              | In a complex with SHARPIN and HOIL-1 mediates M1-linked polyubiquitination of NEMO and RIP1.                         | Facilitates the activation of NF- $\kappa$ B dependent gene expression.    | Diffuse autoinflammation, common variable immunodeficiency, amylopectinosis, and lymphangiectasia.  | (Boisson et al. 2012; Lechtenberg et al. 2016; Oda et al. 2019)                |
| SHARPIN (SHANK-associated RH domain-interacting protein) | Contains a N-terminal pleckstrin homology (PH) domain and a C-terminal ubiquitin-like domain and Np14-zinc finger domain that mediates interaction with HOIP and ubiquitin | In a complex with HOIL-1 and HOIP mediates M1-linked polyubiquitination of NEMO and RIP1.                            | Regulates NF- $\kappa$ B dependent gene expression.                        | Mycosis Fungoides, Cancers.                                                                         | (Chen et al. 2019; Oda et al. 2019; Stieglitz et al. 2012; Tanaka et al. 2016) |
| OTULIN (also known as FAM105B or Gumby)                  | Consists of a catalytic OTU domain responsible for deubiquinating activity and a highly conserved PUB-interacting motif which mediates its ubiquitin binding activity      | Linear ubiquitin chain assembly complex (LUBAC) comprised of HOIP, HOIL-1 and SHARPIN. Directly interacts with HOIP. | Restricts NF- $\kappa$ B signaling in response to TNF and NOD2 stimulation | Potentially fatal autoinflammatory disorder termed OTULIN-related autoinflammatory syndrome (ORAS). | (Damgaard et al. 2016; Stangl et al. 2019)                                     |

|                                          |                                                                                                                                                                              |                    |                                     |                                                              |                                                                 |
|------------------------------------------|------------------------------------------------------------------------------------------------------------------------------------------------------------------------------|--------------------|-------------------------------------|--------------------------------------------------------------|-----------------------------------------------------------------|
|                                          |                                                                                                                                                                              |                    |                                     |                                                              |                                                                 |
| USP7                                     | Contains an N-terminal poly-glutamine stretch and a highly conserved ubiquitin-specific protease (USP) domain responsible for its catalytic and ubiquitin-interacting sites. | TRAF6, Nek2, NEMO  | Regulates NF- $\kappa$ B signaling. | Neurodevelopmental disorders.                                | (Bhattacharya et al. 2018; Fountain et al. 2019)                |
| MYSM1 (myb-like SWIRM and MPN domains 1) | Consists of a central SWIRM domain and C-terminal metalloproteinase domain responsible for its deubiquitinating activity.                                                    | TRAF3, TRAF6, RIP2 | Restricts NF- $\kappa$ B signaling. | Bone-marrow failure syndromes and developmental aberrations. | (Bahrami et al. 2017; Panda and Gekara 2018; Panda et al. 2015) |

### References for Appendix Table 1

- Bahrami E, Witzel M, Racek T, Puchalka J, Hollizeck S, Greif-Kohistani N, Kotlarz D, Horny HP, Feederle R, Schmidt H et al. 2017. Myb-like, swirm, and mpn domains 1 (mysm1) deficiency: Genotoxic stress-associated bone marrow failure and developmental aberrations. *J Allergy Clin Immunol.* 140(4):1112-1119.
- Bhattacharya S, Chakraborty D, Basu M, Ghosh MK. 2018. Emerging insights into hausp (usp7) in physiology, cancer and other diseases. *Signal transduction and targeted therapy.* 3:17-17.
- Boisson B, Laplantine E, Prando C, Giliani S, Israelsson E, Xu Z, Abhyankar A, Israel L, Trevejo-Nunez G, Bogunovic D et al. 2012. Immunodeficiency, autoinflammation and amylopectinosis in humans with inherited hoil-1 and lubac deficiency. *Nat Immunol.* 13(12):1178-1186.
- Chen B, Zheng Y, Zhu J, Liang Y. 2019. Sharpin overexpression promotes tak1 expression and activates jnks and nf-kb pathway in mycosis fungoides. *Experimental Dermatology.* 28(11):1279-1288.

- Damgaard RB, Walker JA, Marco-Casanova P, Morgan NV, Titheradge HL, Elliott PR, McHale D, Maher ER, McKenzie ANJ, Komander D. 2016. The deubiquitinase otulin is an essential negative regulator of inflammation and autoimmunity. *Cell*. 166(5):1215-1230 e1220.
- Elton L, Carpentier I, Verhelst K, Staal J, Beyaert R. 2015. The multifaceted role of the e3 ubiquitin ligase hoil-1: Beyond linear ubiquitination. *Immunological Reviews*. 266(1):208-221.
- Fountain MD, Oleson DS, Rech ME, Segebrecht L, Hunter JV, McCarthy JM, Lupo PJ, Holtgrewe M, Moran R, Rosenfeld JA et al. 2019. Pathogenic variants in *usp7* cause a neurodevelopmental disorder with speech delays, altered behavior, and neurologic anomalies. *Genetics in Medicine*. 21(8):1797-1807.
- Hrdinka M, Yabal M. 2019. Inhibitor of apoptosis proteins in human health and disease. *Genes & Immunity*. 20(8):641-650.
- Lechtenberg BC, Rajput A, Sanishvili R, Dobaczewska MK, Ware CF, Mace PD, Riedl SJ. 2016. Structure of a hoip/e2~ubiquitin complex reveals rbr e3 ligase mechanism and regulation. *Nature*. 529(7587):546-550.
- Mace PD, Shirley S, Day CL. 2010. Assembling the building blocks: Structure and function of inhibitor of apoptosis proteins. *Cell Death & Differentiation*. 17(1):46-53.
- Oda H, Beck DB, Kuehn HS, Sampaio Moura N, Hoffmann P, Ibarra M, Stoddard J, Tsai WL, Gutierrez-Cruz G, Gadina M et al. 2019. Second case of hoip deficiency expands clinical features and defines inflammatory transcriptome regulated by lubac. *Frontiers in Immunology*. 10(479).
- Panda S, Gekara NO. 2018. The deubiquitinase *mym1* dampens nod2-mediated inflammation and tissue damage by inactivating the rip2 complex. *Nature Communications*. 9(1):4654.
- Panda S, Nilsson JA, Gekara NO. 2015. Deubiquitinase *mym1* regulates innate immunity through inactivation of traf3 and traf6 complexes. *Immunity*. 43(4):647-659.
- Seirafi M, Kozlov G, Gehring K. 2015. Parkin structure and function. *FEBS J*. 282(11):2076-2088.
- Stangl A, Elliott PR, Pinto-Fernandez A, Bonham S, Harrison L, Schaub A, Kutzner K, Keusekotten K, Pfluger PT, El Oualid F et al. 2019. Regulation of the endosomal *snx27*-retromer by otulin. *Nature Communications*. 10(1):4320.
- Stieglitz B, Haire LF, Dikic I, Rittinger K. 2012. Structural analysis of sharpin, a subunit of a large multi-protein e3 ubiquitin ligase, reveals a novel dimerization function for the pleckstrin homology superfold. *The Journal of biological chemistry*. 287(25):20823-20829.
- Swatek KN, Komander D. 2016. Ubiquitin modifications. *Cell Res*. 26(4):399-422.
- Tanaka Y, Tateishi K, Nakatsuka T, Kudo Y, Takahashi R, Miyabayashi K, Yamamoto K, Asaoka Y, Ijichi H, Tateishi R et al. 2016. Sharpin promotes hepatocellular carcinoma progression via transactivation of versican expression. *Oncogenesis*. 5(12):e277-e277.
- Veeriah S, Taylor BS, Meng S, Fang F, Yilmaz E, Vivanco I, Janakiraman M, Schultz N, Hanrahan AJ, Pao W et al. 2010. Somatic mutations of the parkinson's disease-associated gene *park2* in glioblastoma and other human malignancies. *Nature genetics*. 42(1):77-82.
- Wang Y, Shan B, Liang Y, Wei H, Yuan J. 2018. Parkin regulates nf-kb by mediating site-specific ubiquitination of ripk1. *Cell Death & Disease*. 9(7):732.

### **Supplemental References for Figure 1**

- Ebersole JL, Dawson III D, Emecen-Huja P, Nagarajan R, Howard K, Grady ME, Thompson K, Peyyala R, Al-Attar A, Lethbridge K et al. 2017. The periodontal war: Microbes and immunity. *Periodontology 2000*. 75(1):52-115.
- Konkel JE, O'Boyle C, Krishnan S. 2019. Distal consequences of oral inflammation. *Frontiers in Immunology*. 10:1403.
- Sahingur SE. 2020. Evolving paradigms in the pathogenesis and management of periodontitis. In: Sahingur SE, editor. *Emerging therapies in periodontics*. Cham: Springer International Publishing. p. 3-12.
- Sahingur SE, Yeudall WA. 2015. Chemokine function in periodontal disease and oral cavity cancer. *Frontiers in Immunology*. 6(214).
